# Supplementary material for: Polygenetic-Risk Scores Related to Crystallin Metabolism Are Associated with Age-Related Cataract Formation and Interact with Hyperglycemia, Hypertension, Western-Style Diet, and Na Intake
Source: MDPI journal article supplement (doi:10.3390/nu12113534), 2020-11-17

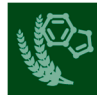

**Table S1.** Factor loadings of food groups in dietary patterns identified using principle component analysis.

| Food group       | Balanced diet |   | Western-style diet |   | Rice-based diet |   |
|------------------|---------------|---|--------------------|---|-----------------|---|
| Rice             | -7            |   | -5                 |   | 90              | * |
| Grain            | 6             |   | 6                  |   | -86             | * |
| Noodles          | -1            |   | 61                 | * | 9               |   |
| Breads           | 10            |   | 57                 | * | -7              |   |
| Cakes            | 9             |   | 33                 |   | 2               |   |
| Cookies          | 53            | * | 7                  |   | -4              |   |
| Beans            | 48            | * | 11                 |   | -9              |   |
| Potatoes         | 42            | * | -1                 |   | 5               |   |
| Kimchi           | 30            |   | 19                 |   | -2              |   |
| Eggs             | 1             |   | 77                 | * | 1               |   |
| Fast foods       | 79            | * | 2                  |   | 0               |   |
| Green vegetables | 74            | * | 4                  |   | 7               |   |
| Mushroom         | 61            | * | -2                 |   | -4              |   |
| White vegetables | 56            | * | 13                 |   | 5               |   |
| Fatty fish       | 64            | * | 14                 |   | 8               |   |
| White fish       | 42            | * | 19                 |   | 11              |   |
| Crabs            | 23            |   | 8                  |   | -1              |   |

|                                   |      |   |      |   |      |
|-----------------------------------|------|---|------|---|------|
| Processed meats                   | 32   |   | 38   |   | 21   |
| Red meats                         | 12   |   | 66   | * | 5    |
| Soups                             | 23   |   | 37   |   | 15   |
| Chickens                          | 59   | * | 2    |   | -6   |
| Seaweeds                          | 36   |   | 7    |   | -8   |
| Milk                              | 33   |   | 9    |   | 0    |
| Beverages                         | -1   |   | 13   |   | 20   |
| Coffee                            | 5    |   | 21   |   | 20   |
| Tea                               | 42   | * | 0    |   | -13  |
| Fruit                             | 41   | * | 4    |   | 10   |
| Pickle                            | -1   |   | 11   |   | 16   |
| Nuts                              | 26   |   | 12   |   | -15  |
| <hr/>                             |      |   |      |   |      |
| Variance Explained by Each Factor | 4.46 |   | 2.35 |   | 1.85 |
| <hr/>                             |      |   |      |   |      |

Printed values are multiplied by 100 and rounded to the nearest integer. \*Values greater than 0.4.

**Table S2.** Adjusted odds ratios for age-related cataract according to the polygenetic risk scores of the best model (PRS) for gene-gene interaction after covariate adjustments.

|                                       | Model 1                        |                                    |                                 | Model 2                            |                                 |
|---------------------------------------|--------------------------------|------------------------------------|---------------------------------|------------------------------------|---------------------------------|
|                                       | Low-PRS<br>( <i>n</i> = 6,877) | Medium-PRS<br>( <i>n</i> = 23,800) | High-PRS<br>( <i>n</i> = 9,784) | Medium-PRS<br>( <i>n</i> = 23,800) | High-PRS<br>( <i>n</i> = 9,784) |
| BMI                                   | 1                              | 0.95 (0.90-1.01)                   | 0.97 (0.90-1.03)                | 0.93 (0.85-1.01)                   | 0.97 (0.88-1.07)                |
| Fasting serum glucose<br>(>126 mg/dL) | 1                              | 1.05 (0.95-1.16)                   | 1.11 (0.99-1.24)                | 1.07 (0.91-1.26)                   | 1.13 (0.95-1.35)                |
| HbA1c                                 | 1                              | 1.18 (0.96-1.45)                   | 1.17 (0.94-1.46)                | 1.14 (0.93-1.41)                   | 1.12 (0.90-1.40)                |
| Hypertension                          | 1                              | 1.01 (0.95-1.08)                   | 1.01 (0.93-1.08)                | 1.04 (0.96-1.14)                   | 1.04 (0.94-1.15)                |
| Plasma LDL cholesterol                | 1                              | 0.99 (0.92-1.07)                   | 0.98 (0.91-1.07)                | 0.98 (0.89-1.08)                   | 1.01 (0.90-1.13)                |
| Plasma HDL cholesterol                | 1                              | 1.03 (0.97-1.09)                   | 1.03 (0.95-1.10)                | 1.05 (0.96-1.15)                   | 1.08 (0.98-1.20)                |
| Plasma TG                             | 1                              | 0.96 (0.91-1.02)                   | 0.95 (0.89-1.02)                | 0.92 (0.85-1.01)                   | 0.94 (0.85-1.03)                |

Values represent odd ratios and 95% confidence intervals. PRSBM including 5 SNPs selecting from GMDR was divided into 3 categories (0-5, 6-7, and  $\geq 8$ ) by tertiles as the low, medium and high groups, respectively. Low-PRSBM was the reference for both model 1 and model 2. \*Significantly different from low PRSBM in logistic regression analysis at \*  $P < 0.05$ , \*\*  $P < 0.01$ , \*\*\*  $P < 0.001$ . Model 1: adjusted for age, gender, residence area, survey year, body mass index (BMI), education, job, and income. Model 2: adjusted for age, gender, residence area, survey year, smoking, alcohol, education, job, income, energy, activity, hypertension, milk, fat percent intake, carbohydrate percent intake, and arthritis and dermatitis medicine intake.

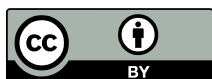

Supplement: s1 [file s1]
